# Supplementary material
Source: HighWire-hosted journal article supplement (https://qualitysafety.bmj.com/content/32/5/274)
Supplement: inline-supplementary-material-5 [file inline-supplementary-material-5.pdf]

**Table A2. Sensitivity analysis IV: Different definitions of the practice population at risk**

|                                                                         | Annual general practice referrals to the NHS DPP |                                                     |                                                     |                        |                                                     |                                                     |
|-------------------------------------------------------------------------|--------------------------------------------------|-----------------------------------------------------|-----------------------------------------------------|------------------------|-----------------------------------------------------|-----------------------------------------------------|
|                                                                         | (1)                                              | (2)                                                 | (3)                                                 | (4)                    | (5)                                                 | (6)                                                 |
| QOF Diabetes achievement†                                               | 1.13***<br>[1.10,1.16]                           | 1.13***<br>[1.10,1.16]                              | 1.11***<br>[1.08,1.14]                              | 1.13***<br>[1.10,1.16] | 1.13***<br>[1.10,1.16]                              | 1.11***<br>[1.08,1.14]                              |
| Proportion of patients reporting good experience making an appointment† | 1.00<br>[0.98,1.03]                              | 1.00<br>[0.97,1.03]                                 | 1.01<br>[0.98,1.04]                                 | 1.00<br>[0.98,1.03]    | 1.00<br>[0.97,1.03]                                 | 1.01<br>[0.98,1.04]                                 |
| Log payment per patient†                                                | 0.99<br>[0.96,1.02]                              | 0.99<br>[0.96,1.02]                                 | 0.99<br>[0.97,1.02]                                 | 0.99<br>[0.96,1.02]    | 0.99<br>[0.96,1.02]                                 | 0.99<br>[0.97,1.02]                                 |
| Population at risk                                                      | Aged 15+                                         | Aged 15+<br>minus patients<br>diagnosed<br>with T2D | Aged 15+<br>minus patients<br>diagnosed<br>with T2D | Aged 18+               | Aged 18+<br>minus patients<br>diagnosed<br>with T2D | Aged 18+<br>minus patients<br>diagnosed<br>with T2D |
| Including practice T2D prevalence as control variable                   | No                                               | No                                                  | Yes                                                 | No                     | No                                                  | Yes                                                 |
| N                                                                       | 22124                                            | 22124                                               | 22124                                               | 22124                  | 22124                                               | 22124                                               |
| N_g                                                                     | 6871                                             | 6871                                                | 6871                                                | 6871                   | 6871                                                | 6871                                                |
| Log-likelihood                                                          | -190803.8                                        | -190928.4                                           | -190905.3                                           | -190816.3              | -190948.3                                           | -190924.7                                           |

Poisson regression with practice random effects. † Coefficients on these variables represent a one standard deviation change in the explanatory variables. Models also include additional practice covariates. 95% confidence intervals in brackets. QOF: Quality and Outcomes Framework. \*  $p < 0.05$ , \*\*  $p < 0.01$ , \*\*\*  $p < 0.001$
